# Supplementary material
Source: PubMed Central journal article supplement (PMC3593832)
Supplement: 1218374110_pnas.201218374SI.pdf [file 1218374110_pnas.201218374SI.pdf]

# Supporting Information

Li et al. 10.1073/pnas.1218374110

## SI Materials and Methods

**Synthesis of tRNA Analogs.** Terminal A<sub>76</sub> in *Mycoplasma mobile* tRNA<sup>Leu</sup> was replaced with 2'-deoxyadenosine (2'dA) or di-deoxyadenosine (ddA) using an adapted protocol (1). Transcribed *M. mobile* tRNA<sup>Leu</sup> (~400 A<sub>260</sub> units) was incubated in 1 mL 50 mM NaOAc (pH 5.2) containing 2.5 mM NaIO<sub>4</sub> at 37 °C for 2 h in the dark. Excess NaIO<sub>4</sub> was reduced at 37 °C for 30 min by incubation with 2 mM glucose. Periodate-oxidized tRNA was ethanol-precipitated and resuspended in 563 μL of water. The terminal adenosine was β-eliminated by incubating periodate-oxidized tRNA with 187 μL of 1 M lysine (pH 9.0) at 25 °C for 2.5 h, followed by desalting using a CHROMA SPIN-10 column (Clontech). The tRNA residual phosphate group was removed by incubation in 1 mL of 100 mM Tris (pH 8.0), 10 mM MgSO<sub>4</sub>, and 10 U of calf intestinal alkaline phosphatase for 1 h at 37 °C. The solution was extracted with an equal volume of phenol:chloroform:isoamyl alcohol (125:24:1, pH 5.2). The organic phase-containing protein was removed and one-half volume of 4.6 M NH<sub>4</sub>OAc (pH 5.0) was added. The tRNA was recovered by ethanol precipitation.

Modified tRNA was incubated with 100 mM Tris (pH 9.0), 100 mM KCl, 2 mM ATP, 2'-dATP or ddATP, 10 mM MgCl<sub>2</sub>, 0.5 mM DTT, and 16 μM *Escherichia coli* CCA-adding enzyme at 32 °C for 3 h. Protein was extracted and tRNA recovered as described above. The tRNA concentration was measured optically at A<sub>260</sub> ( $\epsilon = 840,700 \text{ M}^{-1}\text{cm}^{-1}$ ).

**Biological Sample Preparation.** The *Mycoplasma synoviae* leucyl-tRNA synthetase (LeuRS) gene was synthesized and cloned into pET14b plasmid with TGA codons mutated into TGG (Geneart). A SpeI restriction site was introduced into the plasmid p14LiMmoLeuRS (2) at the site encoding Glu229 and Gly232 within the *M. mobile* LeuRS gene. The resulting plasmid p14bMBMmLeuRSSpeI was linearized and ligated with PCR-amplified DNA sequence of the *M. synoviae* LeuRS connective polypeptide 1 (CP1) domain using In-Fusion Advantage PCR cloning kit (Clontech), yielding plasmid p14bMBMmLeuRS/MsLeuCP1. Protein was expressed in *E. coli* BL21 (DE3) and isolated using Affinity Gel His-Select Nickel resin (Sigma) fol-

lowed by a HiTrap 16/60 size-exclusion Superdex 75 purification column (GE Healthcare) (3).

*M. mobile* LeuRS expression was induced overnight at 25 °C using 1 mM isopropyl β-D-1-thiogalactopyranoside using *E. coli* BL21(pLysS)Plus transformed with plasmid p14LiMmoLeuRS (2). Cells were harvested by centrifugation and resuspended in 10 mM Tris (pH 8.0), 200 mM NaCl, 5 mM NaH<sub>2</sub>PO<sub>4</sub>, and 5% (vol/vol) glycerol, followed by flash-freezing in liquid nitrogen and storage at -80 °C. The cells were lysed by sonication on ice for 2 min with 2-s intervals at 35% sonicator capacity (Vibra Cell; Midwest Scientific), followed by centrifugation at 23,000 × g for 30 min. The supernatant was applied to a HiTrap Chelating HP column and washed with 10 mM Tris-base (pH 8.0), 1 M NaCl, 5 mM NaH<sub>2</sub>PO<sub>4</sub>, and 5% glycerol. A gradient of 10–75 mM imidazole in this buffer was applied before eluting LeuRS with 250 mM imidazole. Subsequent purification on a Superdex 200 column was carried out in 10 mM bis-Tris (pH 6.5), 500 mM NaCl, 2 mM NaH<sub>2</sub>PO<sub>4</sub>, 20 μM ZnCl<sub>2</sub>, and 1% glycerol. Protein was concentrated to 30 mg/mL and flash-frozen in liquid nitrogen for storage at -80 °C.

**Aminoacylation Assays.** Leucylation assays with *M. mobile*, *M. synoviae*, or hybrid LeuRS enzymes were carried out at 25 °C in a 36-μL reaction mixture containing 60 mM Tris (pH 7.5), 10 mM MgCl<sub>2</sub>, 2 mM ATP, 1 mM DTT, 21 μM [<sup>3</sup>H]leucine (318 Ci/mmol), 4 μM tRNA, and 100 nM LeuRS enzyme as described (4). To test for isoleucine mischarging, 40 μM [<sup>3</sup>H]isoleucine (166 Ci/mmol) was used and 1 μM enzyme introduced. LeuRS hydrolytic activity was measured using a reaction mixture consisting of 60 mM Tris (pH 7.5), 10 mM MgCl<sub>2</sub>, and about 6.5 μM [<sup>3</sup>H]Ile-tRNA<sup>Leu</sup> that was prepared as previously described (2).

**Manual Model Building of *M. mobile* LeuRS X-Ray Structure.** Manual model rebuilding was carried out using COOT (5) and was interspersed with a round of structure refinement using both PHENIX (6) and REFMAC (7). Cross validation, using 5% of the data for the calculation of the free R factor, was used throughout the model-building process to monitor building bias (8).

1. Sprinzl M, Cramer F (1975) Site of aminoacylation of tRNAs from *Escherichia coli* with respect to the 2'- or 3'-hydroxyl group of the terminal adenosine. *Proc Natl Acad Sci USA* 72(8):3049–3053.
2. Li L, et al. (2011) Naturally occurring aminoacyl-tRNA synthetases editing-domain mutations that cause mistranslation in *Mycoplasma* parasites. *Proc Natl Acad Sci USA* 108(23):9378–9383.
3. Boniecki MT, Vu MT, Betha AK, Martinis SA (2008) CP1-dependent partitioning of pretransfer and posttransfer editing in leucyl-tRNA synthetase. *Proc Natl Acad Sci USA* 105(49):19223–19228.
4. Karkhanis VA, Boniecki MT, Poruri K, Martinis SA (2006) A viable amino acid editing activity in the leucyl-tRNA synthetase CP1-splicing domain is not required in the yeast mitochondria. *J Biol Chem* 281(44):33217–33225.
5. Adams PD, et al. (2010) PHENIX: A comprehensive Python-based system for macromolecular structure solution. *Acta Crystallogr D Biol Crystallogr* 66(Pt 2):213–221.
6. Emsley P, Lohkamp B, Scott WG, Cowtan K (2010) Features and development of Coot. *Acta Crystallogr D Biol Crystallogr* 66(Pt 4):486–501.
7. Murshudov GN, Vagin AA, Dodson EJ (1997) Refinement of macromolecular structures by the maximum-likelihood method. *Acta Crystallogr D Biol Crystallogr* 53(Pt 3): 240–255.
8. Kleywegt GJ, Brünger AT (1996) Checking your imagination: Applications of the free R value. *Structure* 4(8):897–904.

**Threonine-rich region**

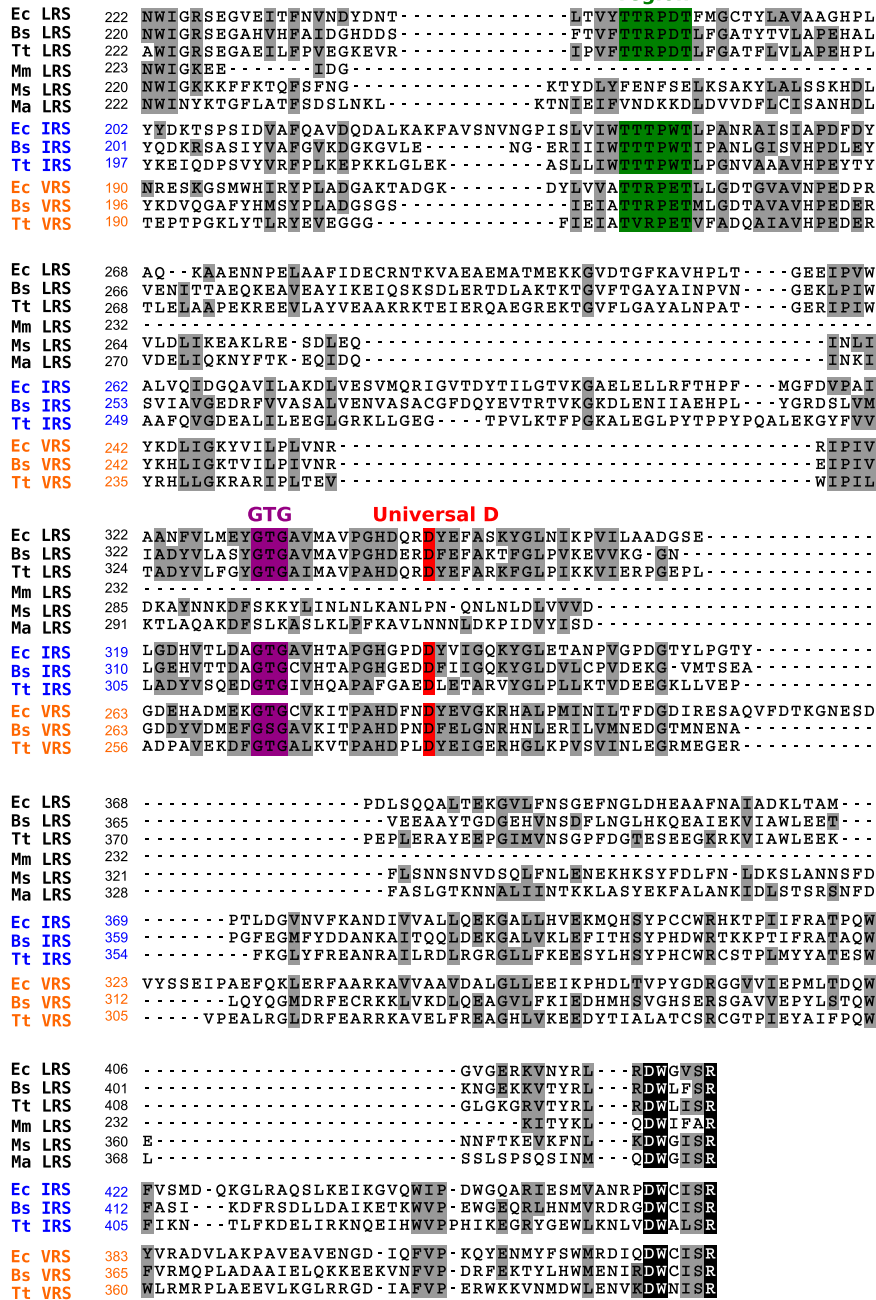

**Fig. S1.** Sequence alignment of CP1 domains. The CP1 domains from representative LeuRS (black), IleRS (blue), and ValRS (orange) were aligned using ClustalW, manually curated, and shaded using Biology Workbench (<http://workbench.sdsc.edu>). Shaded and black boxes denote homologous and conserved residues, respectively. Key motifs and residues of editing are highlighted: threonine-rich region (green), GTG motif (purple), and the universally conserved aspartic acid (red). Organism abbreviations are as follows: Bs, *Bacillus subtilis*; Ec, *Escherichia coli*; Ma, *Mycoplasma agalactiae*; Mm, *Mycoplasma mobile*; Ms, *Mycoplasma synoviae*; Tt, *Thermus thermophilus*.



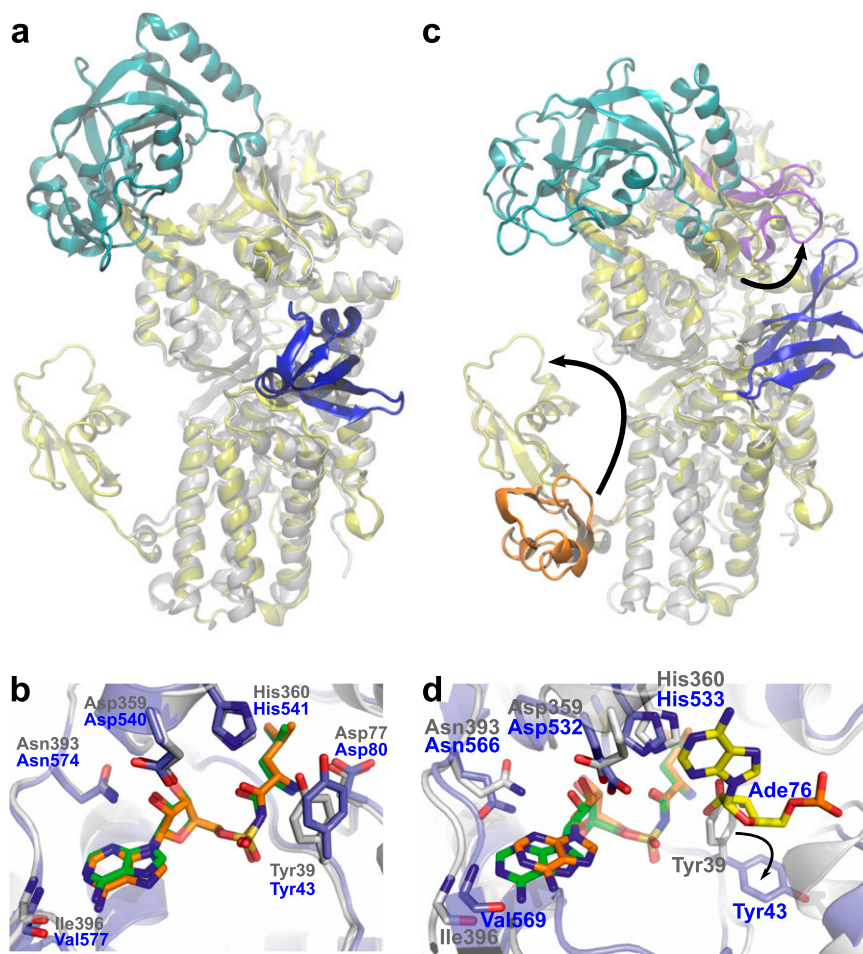

**Fig. S3.** Structural comparison indicates conformational changes for tRNA binding. (A) Structural alignment of *M. mobile* LeuRS (MmLeuRS, yellow) with *T. thermophilus* apo enzyme (TtLeuRS, PDB ID code 1H3N). The main body of TtLeuRS is colored in gray, the CP1 domain in cyan, and the leucine-specific domain in blue. The C-terminal domain of TtLeuRS was not resolved. (B) The aminoacylation site of MmLeuRS (gray) is structurally aligned with TtLeuRS (blue). The bound leucyl adenylate analog, Leu-AMS, is shown in green for MmLeuRS and orange for TtLeuRS. Key residues interacting with Leu-AMS are shown in licorice and labeled. (C) Structural alignment of MmLeuRS (yellow) with *E. coli* LeuRS aminoacylation complex (EcLeuRS, PDB ID code 4AQ7). The EcLeuRS is colored similarly to the TtLeuRS, except its C-terminal domain is shown in orange and its Zn-1 domain in purple. The major domain movement to accommodate tRNA binding is indicated by black arrows. (D) Structural alignment of MmLeuRS (gray) with EcLeuRS (blue). The binding of A<sub>76</sub> of tRNA (yellow) induces the side chain of Tyr43 in EcLeuRS to rotate about 120° (indicated by a black arrow). The leucyl adenylate analog, Leu-AMS, is shown in green for MmLeuRS and orange for EcLeuRS. Key residues interacting with Leu-AMS are shown in stick model and labeled.



**Table S1. Data collection and refinement statistics***M. mobile* LeuRS + Leu-AMS\*

|                                    |                                    |
|------------------------------------|------------------------------------|
| Data collection                    |                                    |
| Space group                        | R32                                |
| Cell dimensions                    |                                    |
| <i>a</i> , <i>b</i> , <i>c</i> (Å) | 202.9, 202.9, 213.9                |
| $\alpha$ , $\beta$ , $\gamma$ (°)  | 90, 90, 120                        |
| Resolution (Å)                     | 12–2.07 (2.07–2.12)                |
| $R_{merge}$                        | 0.227 (0.993)                      |
| $I/\sigma I$                       | 18.45 (2.56)                       |
| Completeness (%)                   | 99.95 (99.20)                      |
| Redundancy                         | 12.4 (11.8)                        |
| Refinement                         |                                    |
| Resolution (Å)                     | 2.07                               |
| No. reflections (work/free)        | 96,445/5,079                       |
| $R_{work}/R_{free}$                | 0.159/0.199                        |
| No. of atoms                       |                                    |
| Protein                            | 5,164 [A] <sup>†</sup> + 4,844 [B] |
| Ligand                             | 31 [E] + 31 [F] (Leu-AMS)          |
| Water/other                        | 1,022/10 glycerol                  |
| <i>B</i> -factors average          |                                    |
| Protein                            | 28.4 [A] <sup>†</sup> /22.7 [B]    |
| Ligand                             | 12.6 [E]/12.7 [F]                  |
| Water                              | 33.2                               |
| Rms deviations                     |                                    |
| Bond lengths (Å)                   | 0.013                              |
| Bond angles (°)                    | 1.509                              |

\*Values in parentheses are for highest-resolution shell.

†Values are for each molecule in the asymmetric unit, with chain indicator given in square brackets.
